# Supplementary material for: Efficacy of Nondiuretic Pharmacotherapy for Improving the Treatment of Congestion in Patients with Acute Heart Failure: A Systematic Review of Randomised Controlled Trials
Source: MDPI journal article supplement (doi:10.3390/jcm11113112), 2022-05-31
Supplement: s1 [file s1]

| Trial                            |            | Study design, Arms, and Objectives | Outcomes                                                                                                      | Results                                                                                                                                                                                                                                                                                                         | Conclusion                                                                                                                                                                                                                                                                                                                                                                                            |                                                                                                                                      |
|----------------------------------|------------|------------------------------------|---------------------------------------------------------------------------------------------------------------|-----------------------------------------------------------------------------------------------------------------------------------------------------------------------------------------------------------------------------------------------------------------------------------------------------------------|-------------------------------------------------------------------------------------------------------------------------------------------------------------------------------------------------------------------------------------------------------------------------------------------------------------------------------------------------------------------------------------------------------|--------------------------------------------------------------------------------------------------------------------------------------|
| Vasodilatory Therapies           |            |                                    |                                                                                                               |                                                                                                                                                                                                                                                                                                                 |                                                                                                                                                                                                                                                                                                                                                                                                       |                                                                                                                                      |
| Vasopressin Receptor Antagonists |            |                                    |                                                                                                               |                                                                                                                                                                                                                                                                                                                 |                                                                                                                                                                                                                                                                                                                                                                                                       |                                                                                                                                      |
| Tolvaptan (N= 6)                 |            |                                    |                                                                                                               |                                                                                                                                                                                                                                                                                                                 |                                                                                                                                                                                                                                                                                                                                                                                                       |                                                                                                                                      |
| 1                                | AQUAMARINE | Matsue et al., 2016[23]<br>Japan   | RCT (n=217 AHF and renal dysfunction) compared the efficacy of adding tolvaptan 15 (mg/day) to loop diuretics | Primary endpoint:<br>UOP within 48h of hospitalisation.<br>Secondary endpoints:<br>- Improvement of dyspnea from baseline measured on patient-reported 7-point Likert scale up to 48 h after enrollment.<br>- Change in B-type natriuretic peptide (BNP)<br>- Change in body weight                             | - The tolvaptan enhanced diuresis more than the conventional treatment (6464.4 vs 4999.2 mL; P < .001)<br>- At all time points within 48 hours, except 6 hours after randomisation, dyspnea improved significantly in the tolvaptan group than in the placebo group.<br>- Significantly more significant weight loss in the tolvaptan group<br>- No significant difference in absolute BNP reduction. | In AHF patients with renal dysfunction, adding tolvaptan to conventional therapy increased diuresis and alleviated dyspnea symptoms. |
| 2                                | TACTICS-HF | Felker et al., 2017[30]<br>USA     | RCT (n=257 patients with AHF) received either 30 mg of oral tolvaptan or a placebo                            | Primary endpoint:<br>The proportion of patients who improved at least moderately in dyspnea on a 7-point Likert scale after 8 and 24 hours.<br>Secondary endpoints:<br>- Dyspnea relief<br>- Fluid loss<br>- Change in body weight<br>- The proportion of patients free from clinical congestion at 48 and 72 h | - Proportion of patients experienced dyspnea relief did not differ significantly between tolvaptan and placebo groups at 8 h (p = 0.59) and at 24 h (p = 0.80).<br>- For the 48-hour treatment period, Tolvaptan was linked to significantly greater weight and fluid loss.                                                                                                                           | Tolvaptan did not improve the proportion of AHF patients classified as responders.                                                   |





|                          |           |                                                             |                                                                                        |                                                                                                                                                           |                                                                                                                                                                                                                                                                                                                             |                                                                                     |
|--------------------------|-----------|-------------------------------------------------------------|----------------------------------------------------------------------------------------|-----------------------------------------------------------------------------------------------------------------------------------------------------------|-----------------------------------------------------------------------------------------------------------------------------------------------------------------------------------------------------------------------------------------------------------------------------------------------------------------------------|-------------------------------------------------------------------------------------|
| 11                       | VMAC      | Publication Committee for the VMAC Investigators, 2002 [35] | RCT (n= 489 patients) compared the efficacy of nesiritide, nitroglycerin, and placebo. | Primary endpoints:<br>- The absolute changes in PCWP<br>- The patient's self-evaluation of dyspnea                                                        | - Nesiritide decreased PCWP from baseline more than placebo (P<0.001) and improved early dyspnea compared with placebo (P=.03).                                                                                                                                                                                             | Nesiritide improves hemodynamic function and dyspnea more effectively than placebo. |
| 12                       | ASCEND-HF | O'Connor et al., 2011 [36]<br>Multinational                 | RCT (n= 7141 patients with AHF compared nesiritide or placebo                          | Primary endpoint:<br>Coprimary endpoints of dyspnea change after six and 24hr (Likert scale).                                                             | - Nesiritide showed non-significant improvements in dyspnea at 6 h (44.5% vs. 42.1%) and 24 h (68.2% vs. 66.1%), compared to placebo.                                                                                                                                                                                       | Nesiritide has a nonsignificant effect on dyspnea.                                  |
| 13                       |           | Shihui Fu et al., 2012 [37]<br>China                        | RCT (n= 140 geriatric patients) compared conventional treatment vs nesiritide.         | Primary endpoints not specified<br>-Dyspnea using the medical research council (MRC) scales.<br>-Assessment of oedema<br>-Assessment of water loss volume | - The nesiritide group had significantly lower MRC scales (p<0.05) and more net body fluid losses (p<0.05) compared to the control group<br>- Sores of oedema had no significant difference on day four between the two groups (p>0.05) but were significantly lower in the nesiritide group on days 8 and 14 (all p<0.05). | Nesiritide was associated with better symptoms relief, such as dyspnea and oedema.  |
| <b>Rolofylline (N=2)</b> |           |                                                             |                                                                                        |                                                                                                                                                           |                                                                                                                                                                                                                                                                                                                             |                                                                                     |





|                       |                   |                                              |                                                                                                                                                           |                                                                                                                                                                      |                                                                                                                                                                                                                                                                                            |                                                                                                  |
|-----------------------|-------------------|----------------------------------------------|-----------------------------------------------------------------------------------------------------------------------------------------------------------|----------------------------------------------------------------------------------------------------------------------------------------------------------------------|--------------------------------------------------------------------------------------------------------------------------------------------------------------------------------------------------------------------------------------------------------------------------------------------|--------------------------------------------------------------------------------------------------|
| 20                    | EMPA-RESPONSE-AHF | Damman et al. 2019[29]<br>Netherlands        | RCT (n= 80 patients) with AHF, diabetic and non-diabetic. Patients were randomised to 10mg/day empagliflozin or placebo as an adjuvant to loop diuretics. | Primary endpoints<br>- Change in the AUC of dyspnea visual analogue scale<br>- Diuretic response<br>- Percentage change in NT-proBNP                                 | - No difference was seen in the AUC of dyspnea VAS over the first four days (P = 0.18) in the empagliflozin and placebo groups, respectively.<br>- Diuretic response and percentage change in NT-proBNP was comparable in empagliflozin and placebo group, (P = 0.37, 0.63, respectively). | Empagliflozin did not enhance diuretic response.                                                 |
| <b>Miscellaneous</b>  |                   |                                              |                                                                                                                                                           |                                                                                                                                                                      |                                                                                                                                                                                                                                                                                            |                                                                                                  |
| <b>Thiamine</b>       |                   |                                              |                                                                                                                                                           |                                                                                                                                                                      |                                                                                                                                                                                                                                                                                            |                                                                                                  |
| 21                    |                   | Smithline et al., 2019 [44]<br>Multinational | RCT (n= 118 patients) examined the effect of adding thiamine to the standard of care                                                                      | Primary endpoint<br>- Dyspnea severity using VAS in three positions: sitting upright on supplemental oxygen, sitting upright off oxygen, or lying supine off oxygen. | - There was only one significant difference between groups over time in dyspnea measured sitting upright on oxygen (P=0.015). Dyspnea did not change in any of the other positions.                                                                                                        | The results of this study do not support the adjuvant use of thiamine in AHF.                    |
| <b>Clevidipine</b>    |                   |                                              |                                                                                                                                                           |                                                                                                                                                                      |                                                                                                                                                                                                                                                                                            |                                                                                                  |
| 22                    | PRONTO            | Peacock et al., 2014[45]<br>Multinational    | RCT to study the efficacy of Clevidipine vs standard of care in patients (n=104) with HF having SBP ≥160 mmHg and dyspnea ≥50 on a scale (VAS)            | Secondary endpoint:<br>-Dyspnea reduction (VAS score) at different time points up to 720 minutes after administration                                                | - Clevidipine patients had more remarkable mean VAS dyspnea improvement than standard care (-37 vs -28mm, p=0.02) at 45 minutes, a difference that persisted for up to 3 h.                                                                                                                | Clevidipine effectively lowers blood pressure and improves dyspnea in hypertensive AHF patients. |
| <b>Glucocorticoid</b> |                   |                                              |                                                                                                                                                           |                                                                                                                                                                      |                                                                                                                                                                                                                                                                                            |                                                                                                  |

|    |           |                      |                                                                                                                                              |                                                                                                                                                                                    |                                                                                                                                                                                                                                                                                                                                                                                        |                                                                                                               |
|----|-----------|----------------------|----------------------------------------------------------------------------------------------------------------------------------------------|------------------------------------------------------------------------------------------------------------------------------------------------------------------------------------|----------------------------------------------------------------------------------------------------------------------------------------------------------------------------------------------------------------------------------------------------------------------------------------------------------------------------------------------------------------------------------------|---------------------------------------------------------------------------------------------------------------|
| 23 | COPE-ADHF | Liu et al., 2014[46] | RCT (n=102 patients) to assess the efficacy of glucocorticoid therapy (single dose dexamethasone followed by prednisolone daily for 1 week). | <p>Other Outcomes</p> <ul style="list-style-type: none"> <li>- Patient-assessed dyspnea (7-point scale).</li> <li>- Physician-assessed global clinical (7-point scale).</li> </ul> | <ul style="list-style-type: none"> <li>- After seven days, the glucocorticoid-treated group had greater patient-assessed dyspnea improvement than the standard treatment group (2.71 vs 1.78 points, <math>P &lt; 0.01</math>).</li> <li>- Improvement in physician-assessed global clinical status, favouring glucocorticoids, were also found (<math>P &lt; 0.01</math>).</li> </ul> | This preliminary trial shows the potential benefit of short-term use of glucocorticoid in patients with ADHF. |
|----|-----------|----------------------|----------------------------------------------------------------------------------------------------------------------------------------------|------------------------------------------------------------------------------------------------------------------------------------------------------------------------------------|----------------------------------------------------------------------------------------------------------------------------------------------------------------------------------------------------------------------------------------------------------------------------------------------------------------------------------------------------------------------------------------|---------------------------------------------------------------------------------------------------------------|

AHF: Acute heart failure; RCT: randomised controlled trial; UOP: urine output; BNP: Brain natriuretic peptide; PCWP: pulmonary capillary wedge pressure; VAS: visual analogue scale; AUC: area under the curve; ADHF: Acute decompensated heart failure; SBP: systolic blood pressure; NT-proBNP: NT-proB-type natriuretic peptide; LVEF: Left ventricular ejection fraction (LVEF); WHF: worsening heart failure; CrCl creatinine clearance.
